# Supplementary material
Source: Research Square preprint supplement (doi:10.21203/rs.3.rs-8929065/v1)
Supplement: Supplementary file 1 [file 287f763152d6bd1b51b2676a.docx]

Table 1: Participant timeline: Schedule of enrollment, interventions, and assessments

|  | **TRIAL PERIOD** | | | | | |
| --- | --- | --- | --- | --- | --- | --- |
|  | **Enrollment** | | **Post-randomization** | | | **Close-out** |
| **TIMEPOINT** | ***screening*** | **baseline** | ***Day 7*** | ***Day 14*** | ***Day 21*** | ***Month 4*** |
| **ENROLLMENT:** |  |  |  |  |  |  |
| **Eligibility screen** | X |  |  |  |  |  |
| **Informed consent** | X |  |  |  |  |  |
| ***Baseline clinical measurements*** |  | X |  |  |  |  |
| **Randomization** |  | X |  |  |  |  |
| **INTERVENTION/ COMPARATOR:** |  |  |  |  |  |  |
| ***CS/PVA membrane (test)*** |  | X |  |  |  |  |
| ***Blood clot (control)*** |  | X |  |  |  |  |
| **ASSESSMENTS:** |  |  |  |  |  |  |
| ***Soft tissue healing*** |  |  | X | X | X |  |
| ***Vertical/horizontal measurements*** |  | X |  |  |  | X |
| ***Keratinized tissue width*** |  | X |  |  |  | X |
| ***Soft tissue gain*** |  |  |  |  |  | X |
| ***Histomorphometry*** |  |  |  |  |  | X |
| ***Adverse events*** |  |  | X | X | X | X |
